# Supplementary material for: Cooperative Governance of Complex Public‐Private Partnership Program: Case Study of Characteristic Town Program
Source: Hindawi journal article supplement (doi:10.1155/2020/8873402), 2020-01-01
Supplement: f1 [file 8873402.f1.docx]

Questionnaire description：

This questionnaire describes the relationship between different stakeholders to construct the Communication and Cooperation Networks and Supervisory Relationship Networks. It is hard to describe the relationship between someone to others. However，this study use communication frequency to measure communication and cooperation and use supervise relationship to measure supervisory relationship. The interviewer need to evaluate his/her stakeholder to others relationship by his/her working experience.

Questionnaire（问卷）

Gender（性别）：

Age（年龄）：

Work experience（工作经验年限）：

1.Which stakeholders are you？（请问您属于什么利益相关方？）

2.You need to evaluate the communication frequency with another stakeholder in program one by one. “0” is viewed as no communication, “1” represents communication once a mouth, “2” represents communication once a week, “3” represents communication 2-3 times a week and “4” represents communication more the once a day（don’t evaluate yourself）.（请你提供你与项目群其他每一个利益相关方沟通频率，当问卷填写者认为基本无交流可以选0，每月一次交流可以选1，每周一次交流可以选2，每周2-3次交流可以选3，每日一次以上交流可以选4，表明问卷填写者的观察结果，不要评价你与你自己的沟通频率）

Private partner（社会资本方）：

Government operations management company（政府投资平台）：

SPV （特许经营公司）：

Local Bureau of Finance（地方财政局）：

Local Development and Reform Commission（地方发改委）：

Project leading group（项目领导团队）：

Project headquarters（项目指挥部）：

Designing unit of project（项目设计团队）：

Project contractor（项目承包方）：

Project supervisor（项目监理方）：

Bank（银行）：

Other enterprise’ financial company（其他公司财务公司）：

Project supplier（项目供货商）：

Management unit of facilities（设施管理单位）：

Sewage waste management organization（污水废弃管理机构）：

Solid waste management organization（固体废弃管理机构）：

Water supply organization（供水机构）：

Heating organization（供热机构）：

Gas supply organization（供气机构）：

Utility tunnel management organization（综合管廊管理机构）：

Designer of sewage waste facilities（污水废弃设施设计方）：

Contractor of sewage waste facilities（污水废弃设施承包方）：

Supervisor of sewage waste facilities（污水废弃设施监理方）：

Supplier of sewage waste facilities（污水废弃设施供应商）：

Designer of solid waste facilities（固体废弃设施设计方）：

Contractor of solid waste facilities（固体废弃设施承包方）：

Supervisor of solid waste facilities （固体废弃设施监理方）：

Supplier of solid waste facilities（固体废弃设施供应商）：

Designer of water supply facilities（供水设施设计方）：

Contractor of water supply facilities （供水设施承包方）：

Supervisor of water supply facilities（供水设施监理方）：

Supplier of water supply facilities（供水设施供应商）：

Designer of heating systems（供热设施设计方）：

Contractor of heating systems（供热设施承包方）：

Supervisor of heating systems（供热设施监理方）：

Supplier of heating systems（供热设施供应商）：

Designer of gas supply facilities（供气设施设计方）：

Contractor of gas supply facilities（供气设施承包方）：

Supervisor of gas supply facilities（供气设施监理方）：

Supplier of gas supply facilities （供气设施供应商）：

Designer of utility tunnel（综合管廊设施设计方）：

Contractor of utility tunnel（综合管廊设施承包方）：

Supervisor of utility tunnel（综合管廊设施监理方）：

Supplier of utility tunnel（综合管廊设施供应商）：

Government（地方政府）：

Designer of industrial park road（园区道路设计方）：

Contractor of industrial park road（园区道路承包方）：

Supervisor of industrial park road（园区道路监理方）：

Supplier of industrial park road（园区道路供应商）：

3. You need to evaluate the supervise relationship with another stakeholder in program one by one. “0” indicates that there is no supervision relation, “1” indicates that there exists reporting relationship form another stakeholder to respondents, and “2” represents that the respondents supervises another stakeholder（don’t evaluate yourself）.（请你评估你与项目群其他每一个利益相关方的监督关系，当问卷填写者认为无监督关系可以选0，当问卷填写者认为存在对方向自己报备关系可以选1，当问卷填写者认为存在对方被自己监督关系可以选2，不要评价你与自己的监督关系）

Private partner（社会资本方）：

Government operations management company（政府投资平台）：

SPV （特许经营公司）：

Local Bureau of Finance（地方财政局）：

Local Development and Reform Commission（地方发改委）：

Project leading group（项目领导团队）：

Project headquarters（项目指挥部）：

Designing unit of project（项目设计团队）：

Project contractor（项目承包方）：

Project supervisor（项目监理方）：

Bank（银行）：

Other enterprise’ financial company（其他公司财务公司）：

Project supplier（项目供货商）：

Management unit of facilities（设施管理单位）：

Sewage waste management organization（污水废弃管理机构）：

Solid waste management organization（固体废弃管理机构）：

Water supply organization（供水机构）：

Heating organization（供热机构）：

Gas supply organization（供气机构）：

Utility tunnel management organization（综合管廊管理机构）：

Designer of sewage waste facilities（污水废弃设施设计方）：

Contractor of sewage waste facilities（污水废弃设施承包方）：

Supervisor of sewage waste facilities（污水废弃设施监理方）：

Supplier of sewage waste facilities（污水废弃设施供应商）：

Designer of solid waste facilities（固体废弃设施设计方）：

Contractor of solid waste facilities（固体废弃设施承包方）：

Supervisor of solid waste facilities （固体废弃设施监理方）：

Supplier of solid waste facilities（固体废弃设施供应商）：

Designer of water supply facilities（供水设施设计方）：

Contractor of water supply facilities （供水设施承包方）：

Supervisor of water supply facilities（供水设施监理方）：

Supplier of water supply facilities（供水设施供应商）：

Designer of heating systems（供热设施设计方）：

Contractor of heating systems（供热设施承包方）：

Supervisor of heating systems（供热设施监理方）：

Supplier of heating systems（供热设施供应商）：

Designer of gas supply facilities（供气设施设计方）：

Contractor of gas supply facilities（供气设施承包方）：

Supervisor of gas supply facilities（供气设施监理方）：

Supplier of gas supply facilities （供气设施供应商）：

Designer of utility tunnel（综合管廊设施设计方）：

Contractor of utility tunnel（综合管廊设施承包方）：

Supervisor of utility tunnel（综合管廊设施监理方）：

Supplier of utility tunnel（综合管廊设施供应商）：

Government（地方政府）：

Designer of industrial park road（园区道路设计方）：

Contractor of industrial park road（园区道路承包方）：

Supervisor of industrial park road（园区道路监理方）：

Supplier of industrial park road（园区道路供应商）：

Thank you for your cooperation！Please contract [cz0021@126.com](mailto:cz0021@126.com) when you get any questions from questionnaire. （感谢您的配合！[如果你回答问卷有任何问题请联系 cz0021@126.com](mailto:如果你回答问卷有任何问题请联系%20%20%20cz0021@126.com)。）
